# Supplementary material
Source: MDPI journal article supplement (https://www.mdpi.com/2071-1050/14/17/10979)
Supplement: s1 [file s1]

**Table S1.** List of plant species present in the floristic inventories

| Date | treatment          | t <sub>1</sub> | species list                                                                                                                                                                                                                                                                                                                                                                                                                                                                                                                                                                                                                                                                                                                                                           | t <sub>2</sub> | species list                                                                                                                                                                                                                                                                                                                                                                                                                                                                                                                                                                                                                                                                                                                                                               | t <sub>3</sub> | species list                                                                                                                                                                                                                                                                                                                                                                                                                                                                                                                                                                                                                                                                                                                                                                           | t <sub>4</sub> | species list                                                                                                                                                                                                                                                                                                                                                                                                                                                                                                                                                                                                                                                                                                                                                                                                                |
|------|--------------------|----------------|------------------------------------------------------------------------------------------------------------------------------------------------------------------------------------------------------------------------------------------------------------------------------------------------------------------------------------------------------------------------------------------------------------------------------------------------------------------------------------------------------------------------------------------------------------------------------------------------------------------------------------------------------------------------------------------------------------------------------------------------------------------------|----------------|----------------------------------------------------------------------------------------------------------------------------------------------------------------------------------------------------------------------------------------------------------------------------------------------------------------------------------------------------------------------------------------------------------------------------------------------------------------------------------------------------------------------------------------------------------------------------------------------------------------------------------------------------------------------------------------------------------------------------------------------------------------------------|----------------|----------------------------------------------------------------------------------------------------------------------------------------------------------------------------------------------------------------------------------------------------------------------------------------------------------------------------------------------------------------------------------------------------------------------------------------------------------------------------------------------------------------------------------------------------------------------------------------------------------------------------------------------------------------------------------------------------------------------------------------------------------------------------------------|----------------|-----------------------------------------------------------------------------------------------------------------------------------------------------------------------------------------------------------------------------------------------------------------------------------------------------------------------------------------------------------------------------------------------------------------------------------------------------------------------------------------------------------------------------------------------------------------------------------------------------------------------------------------------------------------------------------------------------------------------------------------------------------------------------------------------------------------------------|
| 2021 | Clearing + Grazing |                | <i>Agrostemma githago</i> L.<br><i>Anagallis arvensis</i> L.<br><i>Arnoseris minima</i> (L.) Schweigg. & Körte<br><i>Artemisia</i> sp.<br><i>Briza maxima</i> L.<br><i>Bromus diandrus</i> Roth<br><i>Bromus madritensis</i> L.<br><i>Bromus</i> sp.<br><i>Cerastium</i> sp.<br><i>Cistus ladanifer</i> L.<br><i>Cynosurus</i> sp.<br><i>Cytisus multiflorus</i> (L'Her.) Sweet<br><i>Dactylis glomerata</i> L.<br><i>Gramineae</i> (sp.)<br><i>Hypochoeris</i> sp.<br><i>Juncus</i> sp.<br><i>Lathyrus</i> sp.<br><i>Lavandula stoechas</i> L.<br><i>Micropyrum</i> sp.<br><i>Molineriella</i> sp.<br><i>Myosotis</i> sp.<br><i>Ornithopus</i> sp.<br><br><i>Ranunculus</i> sp.<br><br><i>Sherardia arvensis</i> L.<br><i>Vicia sativa</i> L.<br><br><i>Vicia</i> sp. |                | <i>Andryala integrifolia</i> L.<br><i>Anthemis</i> sp.<br><br><i>Avena fatua</i> L.<br><i>Bromus diandrus</i> Roth<br><i>Bromus madritensis</i> L.<br><br><i>Bromus</i> sp.<br><i>Cistus ladanifer</i> L.<br><i>Coleostephus</i> sp.<br><i>Crepis</i> sp.<br><i>Cytisus multiflorus</i> (L'Her.) Sweet<br><br><i>Dactylis glomerata</i> L.<br><i>Echium</i> sp.<br><i>Galium</i> sp.<br><i>Gramineae</i> (sp.)<br><i>Herniaria</i> sp.<br><i>Hypochoeris</i> sp.<br><i>Jasione montana</i> L.<br><i>Lavandula stoechas</i> L.<br><i>Molineriella</i> sp.<br><i>Ornithopus</i> sp.<br><i>Quercus ilex</i> L.<br><i>Rumex</i> sp.<br><br><i>Sanguisorba</i> sp.<br><br><i>Sherardia arvensis</i> L.<br><i>Vulpia bromoides</i> (L.) Gray<br><br><i>Bromus madritensis</i> L. |                | <i>Andryala integrifolia</i> L.<br><br><i>Briza maxima</i> L.<br><br><i>Caryophyllaceae</i> (sp.)<br><i>Cistus ladanifer</i> L.<br><i>Crepis</i> sp.<br><i>Cruciferae</i> (sp.)<br><i>Cytisus multiflorus</i> (L'Her.) Sweet<br><i>Hypochoeris</i> sp.<br><i>Jasione montana</i> L.<br><br><i>Juncus</i> sp.<br><i>Lavandula stoechas</i> L.<br><br><i>Lotus</i> sp.<br><i>Molineriella</i> sp.<br><i>Myosotis</i> sp.<br><i>Ornithopus</i> sp.<br><i>Ranunculus</i> sp.<br><i>Rumex</i> sp.<br><i>Sanguisorba</i> sp.<br><i>Sherardia arvensis</i> L.<br><i>Trifolium</i> sp.<br><i>Tuberaria guttata</i> (L.) Fourr.<br><br><i>Vicia</i> sp.<br><br><i>Vulpia bromoides</i> (L.) Gray<br><br><i>Avena fatua</i> L.<br><i>Campanula rapunculus</i> L.<br><br><i>Daphne gnidium</i> L. |                | <i>Arenaria macrocalyx</i> Tausch<br><i>Arnoseris minima</i> (L.) Schweigg. & Körte<br><br><i>Briza maxima</i> L.<br><i>Bromus diandrus</i> Roth<br><i>Bromus madritensis</i> L.<br><i>Cerastium</i> sp.<br><i>Cistus ladanifer</i> L.<br><i>Cynosurus</i> sp.<br><i>Cytisus multiflorus</i> (L'Her.) Sweet<br><i>Cytisus scoparius</i> (L.) Link<br><i>Dactylis glomerata</i> L.<br><i>Hypochoeris</i> sp.<br><i>Micropyrum</i> sp.<br><i>Molineriella</i> sp.<br><i>Ornithopus perpusillus</i> L.<br><i>Ornithopus</i> sp.<br><i>Quercus ilex</i> L.<br><i>Sherardia arvensis</i> L.<br><i>Tuberaria guttata</i> (L.) Fourr.<br><i>Vicia sativa</i> L.<br><i>Vicia</i> sp.<br><i>Vulpia bromoides</i> (L.) Gray<br><br><i>Agrostemma githago</i> L.<br><br><i>Andryala integrifolia</i> L.<br><i>Quercus faginea</i> Lam. |

|        |                                       |                                 |                           |
|--------|---------------------------------------|---------------------------------|---------------------------|
|        | <i>Viola</i> sp.                      | <i>Eryngium</i> sp.             | <i>Eryngium</i> sp.       |
|        | <i>Vulpia bromoides</i> (L.) Gray     | <i>Geranium</i> sp.             | <i>Silene nutans</i> L.   |
| around | <i>Arenaria macrocalyx</i> Tausch     | <i>Orobanche</i> sp.            | <i>Thapsia villosa</i> L. |
|        | <i>Avena fatua</i> L.                 | <i>Raphanus raphanistrum</i> L. |                           |
|        | <i>Crepis</i> sp.                     | <i>Tolpis</i> sp.               |                           |
|        | <i>Quercus faginea</i> Lam.           | <i>Vicia</i> sp.                |                           |
|        | <i>Sesamoides interrupta</i> (Boreau) |                                 |                           |
|        | G.López                               |                                 |                           |
|        | <i>Silene gallica</i> L.              |                                 |                           |

| 2021 | Clearing + No grazing | t <sub>1</sub>                                                                                                                                                                                                                                                                                                                                                                                                                                                                                                                                                                                                                                                                                                                                                                                                                             | t <sub>2</sub>                                                                                                                                                                                                                                                                                                                                                                                                                                                                                                                                                                                                                                                                                                                                                                                                                                                                   | t <sub>3</sub>                                                                                                                                                                                                                                                                                                                                                                                                                                                                                                                                                                                                                                                                                                                                                                                                                                                                                   | t <sub>4</sub>                                                                                                                                                                                                                                                                                                                                                                                                                                                                                                                                                                                                                                                                                                                                                                                                                                                                                                                                           |
|------|-----------------------|--------------------------------------------------------------------------------------------------------------------------------------------------------------------------------------------------------------------------------------------------------------------------------------------------------------------------------------------------------------------------------------------------------------------------------------------------------------------------------------------------------------------------------------------------------------------------------------------------------------------------------------------------------------------------------------------------------------------------------------------------------------------------------------------------------------------------------------------|----------------------------------------------------------------------------------------------------------------------------------------------------------------------------------------------------------------------------------------------------------------------------------------------------------------------------------------------------------------------------------------------------------------------------------------------------------------------------------------------------------------------------------------------------------------------------------------------------------------------------------------------------------------------------------------------------------------------------------------------------------------------------------------------------------------------------------------------------------------------------------|--------------------------------------------------------------------------------------------------------------------------------------------------------------------------------------------------------------------------------------------------------------------------------------------------------------------------------------------------------------------------------------------------------------------------------------------------------------------------------------------------------------------------------------------------------------------------------------------------------------------------------------------------------------------------------------------------------------------------------------------------------------------------------------------------------------------------------------------------------------------------------------------------|----------------------------------------------------------------------------------------------------------------------------------------------------------------------------------------------------------------------------------------------------------------------------------------------------------------------------------------------------------------------------------------------------------------------------------------------------------------------------------------------------------------------------------------------------------------------------------------------------------------------------------------------------------------------------------------------------------------------------------------------------------------------------------------------------------------------------------------------------------------------------------------------------------------------------------------------------------|
|      |                       | <i>Anagallis arvensis</i> L.<br><i>Andryala integrifolia</i> L.<br><br><i>Anthemis</i> sp.<br><i>Arrhenatherum elatius</i> (L.) P.Beauv. ex J.Presl & C.Presl.<br><br><i>Avena fatua</i> L.<br><i>Briza maxima</i> L.<br><i>Bromus sterilis</i> L.<br><i>Bromus diandrus</i> Roth<br><i>Bromus madritensis</i> L.<br><br><i>Bromus</i> sp.<br><i>Campanula</i> sp.<br><i>Cerastium</i> sp.<br><i>Crepis</i> sp.<br><i>Cytisus multiflorus</i> (L'Her.) Sweet<br><i>Dactylis glomerata</i> L.<br><i>Fraxinus angustifolia</i> Vahl<br><i>Galium broterianum</i> Boiss. & Reut.<br><br><i>Galium</i> sp.<br><i>Herniaria</i> sp.<br><i>Hypochoeris</i> sp.<br><i>Jasione montana</i> L.<br><br><i>Juncus</i> sp.<br><i>Micropyrum</i> sp.<br><i>Molineriella</i> sp.<br><i>Myosotis</i> sp.<br><i>Ranunculus</i> sp.<br><br><i>Rubus</i> sp. | <i>Anagallis arvensis</i> L.<br><i>Andryala integrifolia</i> L.<br><i>Arrhenatherum elatius</i> (L.) P.Beauv. ex J.Presl & C.Presl.<br><br><i>Avena fatua</i> L.<br><br><i>Briza maxima</i> L.<br><i>Bromus madritensis</i> L.<br><br><i>Bromus</i> sp.<br><i>Campanula</i> sp.<br><i>Cerastium</i> sp.<br><i>Cistus ladanifer</i> L.<br><br><i>Crepis</i> sp.<br><i>Cytisus multiflorus</i> (L'Her.) Sweet<br><i>Cytisus scoparius</i> (L.) Link<br><i>Dactylis glomerata</i> L.<br><i>Fraxinus angustifolia</i> Vahl<br><i>Galium broterianum</i> Boiss. & Reut.<br><br><i>Galium</i> sp.<br><i>Gramineae</i> (sp.)<br><i>Holcus</i> sp.<br><i>Hypochoeris</i> sp.<br><i>Jasione montana</i> L.<br><br><i>Leontodon</i> sp.<br><br><i>Lonicera</i> sp.<br><i>Molineriella</i> sp.<br><br><i>Ornithopus</i> sp.<br><br><i>Quercus faginea</i> Lam.<br><br><i>Ranunculus</i> sp. | <i>Anagallis arvensis</i> L.<br><i>Andryala integrifolia</i> L.<br><br><i>Arenaria macrocalyx</i> Tausch<br><i>Arnoseris minima</i> (L.) Schweigg. & Körte<br><br><i>Arrhenatherum elatius</i> (L.) P.Beauv. ex J.Presl & C.Presl.<br><br><i>Avena fatua</i> L.<br><br><i>Briza maxima</i> L.<br><br><i>Bromus diandrus</i> Roth<br><i>Bromus madritensis</i> L.<br><br><i>Bromus</i> sp.<br><i>Campanula</i> sp.<br><i>Cerastium</i> sp.<br><i>Compositae</i> (sp.)<br><br><i>Crepis</i> sp.<br><br><i>Cytisus multiflorus</i> (L'Her.) Sweet<br><i>Galium broterianum</i> Boiss. & Reut.<br><br><i>Galium</i> sp.<br><i>Hypochoeris</i> sp.<br><i>Jasione montana</i> L.<br><br><i>Leontodon</i> sp.<br><br><i>Lonicera</i> sp.<br><i>Micropyrum</i> sp.<br><i>Molineriella</i> sp.<br><br><i>Ranunculus</i> sp.<br><br><i>Rubus</i> sp.<br><br><i>Rumex</i> sp.<br><br><i>Sanguisorba</i> sp. | <i>Anagallis arvensis</i> L.<br><i>Andryala integrifolia</i> L.<br><br><i>Arnoseris minima</i> (L.) Schweigg. & Körte<br><i>Arrhenatherum elatius</i> (L.) P.Beauv. ex J.Presl & C.Presl.<br><br><i>Avena fatua</i> L.<br><br><i>Briza maxima</i> L.<br><br><i>Bromus</i> sp.<br><br><i>Campanula</i> sp.<br><br><i>Cerastium</i> sp.<br><br><i>Clinopodium nepeta</i> (L.) Kuntze<br><br><i>Crepis</i> sp.<br><br><i>Cruciferae</i> (sp.)<br><br><i>Cytisus multiflorus</i> (L'Her.) Sweet<br><br><i>Cytisus scoparius</i> (L.) Link<br><br><i>Dactylis glomerata</i> L.<br><br><i>Galium mollugo</i> L.<br><br><i>Geranium dissectum</i> L.<br><br><i>Geranium lucidum</i> L.<br><br><i>Geranium</i> sp.<br><br><i>Herniaria</i> sp.<br><br><i>Hypericum perforatum</i> L.<br><br><i>Hypochoeris</i> sp.<br><br><i>Leontodon</i> sp.<br><br><i>Lonicera</i> sp.<br><br><i>Molineriella</i> sp.<br><br><i>Myosotis</i> sp.<br><br><i>Ornithopus</i> sp. |



| 2021 | No Clearing +<br>Grazing | t <sub>1</sub>                                                                                                                                                                                                                                                                                                                                                                                                                                                                                                                                                                                                                                                                                                                                                                                                    | t <sub>2</sub>                                                                                                                                                                                                                                                                                                                                                                                                                                                                                                                                                                                                                                                                                                                                                                                | t <sub>3</sub>                                                                                                                                                                                                                                                                                                                                                                                                                                                                                                                                                                                                                                                                                                                    | t <sub>4</sub>                                                                                                                                                                                                                                                                                                                                                                                                                                                                                                                                                                                                                                                                                                                                           |
|------|--------------------------|-------------------------------------------------------------------------------------------------------------------------------------------------------------------------------------------------------------------------------------------------------------------------------------------------------------------------------------------------------------------------------------------------------------------------------------------------------------------------------------------------------------------------------------------------------------------------------------------------------------------------------------------------------------------------------------------------------------------------------------------------------------------------------------------------------------------|-----------------------------------------------------------------------------------------------------------------------------------------------------------------------------------------------------------------------------------------------------------------------------------------------------------------------------------------------------------------------------------------------------------------------------------------------------------------------------------------------------------------------------------------------------------------------------------------------------------------------------------------------------------------------------------------------------------------------------------------------------------------------------------------------|-----------------------------------------------------------------------------------------------------------------------------------------------------------------------------------------------------------------------------------------------------------------------------------------------------------------------------------------------------------------------------------------------------------------------------------------------------------------------------------------------------------------------------------------------------------------------------------------------------------------------------------------------------------------------------------------------------------------------------------|----------------------------------------------------------------------------------------------------------------------------------------------------------------------------------------------------------------------------------------------------------------------------------------------------------------------------------------------------------------------------------------------------------------------------------------------------------------------------------------------------------------------------------------------------------------------------------------------------------------------------------------------------------------------------------------------------------------------------------------------------------|
|      |                          | <i>Anagallis arvensis</i> L.<br><i>Andryala integrifolia</i> L.<br><i>Arrhenatherum elatius</i> (L.) P.Beauv. ex<br>J.Presl & C.Presl.<br><i>Avena</i> sp.<br><i>Briza maxima</i> L.<br><i>Bromus</i> sp.<br><i>Cerastium</i> sp.<br><i>Crepis</i> sp.<br><i>Cynosurus</i> sp.<br><i>Cytisus multiflorus</i> (L'Her.) Sweet<br><i>Cytisus scoparius</i> (L.) Link<br><i>Dactylis glomerata</i> L.<br><i>Galium</i> sp.<br><i>Geranium</i> sp.<br><i>Gramineae</i> (sp.)<br><i>Holcus</i> sp.<br><i>Hypericum perforatum</i> L.<br><i>Hypochoeris</i> sp.<br><i>Jasione montana</i> L.<br><i>Juncus</i> sp.<br><i>Leontodon</i> sp.<br><i>Micropyrum</i> sp.<br><i>Molineriella</i> sp.<br><i>Myosotis</i> sp.<br><i>Ornithopus</i> sp.<br><i>Physospermum cornubiense</i> (L.) DC.<br><i>Quercus faginea</i> Lam. | <i>Anagallis arvensis</i> L.<br><i>Andryala integrifolia</i> L.<br><br><i>Briza maxima</i> L.<br><i>Campanula</i> sp.<br><i>Cerastium</i> sp.<br><i>Crataegus monogyna</i> Jacq.<br><i>Crepis</i> sp.<br><i>Cynosurus</i> sp.<br><i>Cytisus multiflorus</i> (L'Her.) Sweet<br><i>Cytisus scoparius</i> (L.) Link<br><i>Dactylis glomerata</i> L.<br><i>Fumaria</i> sp.<br><i>Galium mollugo</i> L.<br><i>Galium</i> sp.<br><i>Geranium</i> sp.<br><i>Holcus</i> sp.<br><i>Hypericum perforatum</i> L.<br><i>Jasione montana</i> L.<br><i>Leontodon</i> sp.<br><i>Lonicera</i> sp.<br><i>Micropyrum</i> sp.<br><i>Molineriella</i> sp.<br><i>Myosotis</i> sp.<br><i>Petrorhagia</i> sp.<br><i>Physospermum cornubiense</i> (L.)<br>DC.<br><i>Quercus faginea</i> Lam.<br><i>Ranunculus</i> sp. | <i>Anagallis arvensis</i> L.<br><i>Andryala integrifolia</i> L.<br><br><i>Aphanes</i> sp.<br><i>Briza maxima</i> L.<br><i>Bromus</i> sp.<br><i>Campanula</i> sp.<br><i>Cerastium</i> sp.<br><i>Crepis</i> sp.<br><i>Cynosurus</i> sp.<br><i>Cytisus multiflorus</i> (L'Her.) Sweet<br><i>Digitalis purpurea</i> L.<br><i>Galium</i> sp.<br><i>Geranium lucidum</i> L.<br><i>Geranium</i> sp.<br><i>Gramineae</i> (sp.)<br><i>Hypochoeris</i> sp.<br><i>Lactuca</i> sp.<br><i>Leontodon</i> sp.<br><i>Lonicera</i> sp.<br><i>Lotus</i> sp.<br><i>Molineriella</i> sp.<br><i>Ornithopus</i> sp.<br><i>Pedicularis</i> sp.<br><i>Quercus faginea</i> Lam.<br><br><i>Quercus ilex</i> L.<br><i>Ranunculus</i> sp.<br><i>Rubus</i> sp. | <i>Anagallis arvensis</i> L.<br><i>Briza maxima</i> L.<br><br><i>Bromus</i> sp.<br><i>Campanula</i> sp.<br><i>Cerastium</i> sp.<br><i>Cistus ladanifer</i> L.<br><i>Crepis</i> sp.<br><i>Cynosurus</i> sp.<br><i>Cytisus multiflorus</i> (L'Her.) Sweet<br><i>Cytisus scoparius</i> (L.) Link<br><i>Digitalis purpurea</i> L.<br><i>Geranium lucidum</i> L.<br><i>Geranium</i> sp.<br><i>Hypochoeris</i> sp.<br><i>Jasione montana</i> L.<br><i>Juncus</i> sp.<br><i>Lathyrus</i> sp.<br><i>Leontodon</i> sp.<br><i>Lonicera</i> sp.<br><i>Micropyrum</i> sp.<br><i>Myosotis</i> sp.<br><i>Ornithopus</i> sp.<br><i>Pedicularis</i> sp.<br><i>Quercus faginea</i> Lam.<br><br><i>Quercus ilex</i> L.<br><i>Quercus suber</i> L.<br><i>Ranunculus</i> sp. |

|        |                                   |                                               |                                                                            |                                   |
|--------|-----------------------------------|-----------------------------------------------|----------------------------------------------------------------------------|-----------------------------------|
|        | <i>Ranunculus</i> sp.             | <i>Sedum forsterianum</i> Sm.                 | <i>Sanguisorba</i> sp.                                                     | <i>Sherardia arvensis</i> L.      |
|        | <i>Rosa canina</i> L.             | <i>Smilax aspera</i> L.                       | <i>Sedum forsterianum</i> Sm.                                              | <i>Vicia</i> sp.                  |
|        | <i>Sanguisorba</i> sp.            | <i>Trifolium</i> sp.                          | <i>Sedum</i> sp.                                                           | <i>Viola</i> sp.                  |
|        | <i>Thapsia villosa</i> L.         | <i>Vicia</i> sp.                              | <i>Silene</i> sp.                                                          | <i>Vulpia bromoides</i> (L.) Gray |
|        | <i>Trifolium</i> sp.              | <i>Vulpia bromoides</i> (L.) Gray             | <i>Stellaria holostea</i> L.                                               | <i>Arenaria macrocalyx</i> Tausch |
|        | <i>Vicia lutea</i> L.             | around <i>Anogramma leptophylla</i> (L.) Link | <i>Thapsia villosa</i> L.                                                  | <i>Crataegus monogyna</i> Jacq.   |
|        | <i>Vicia</i> sp.                  | <i>Campanula</i> sp.                          | <i>Umbelliferae</i> (sp.)                                                  | <i>Daphne gnidium</i> L.          |
|        | <i>Vulpia bromoides</i> (L.) Gray | <i>Digitalis purpurea</i> L.                  | <i>Veronica</i> sp.                                                        | <i>Hypericum perforatum</i> L.    |
| around | <i>Eryngium</i> sp.               | <i>Fraxinus angustifolia</i> Vahl             | <i>Vicia lutea</i> L.                                                      | <i>Orobanche</i> sp.              |
|        | <i>Lavandula stoechas</i> L.      | <i>Orobanche</i> sp.                          | <i>Vicia sativa</i> L.                                                     | <i>Rosa</i> sp.                   |
|        | <i>Orobanche</i> sp.              | <i>Rosa canina</i> L.                         | <i>Vicia</i> sp.                                                           | <i>Smilax aspera</i> L.           |
|        | <i>Quercus suber</i> L.           | <i>Silene latifolia</i> Poir.                 | <i>Vulpia bromoides</i> (L.) Gray                                          |                                   |
|        | <i>Sedum forsterianum</i> Sm.     | <i>Vicia lutea</i> L.                         | around <i>Arrhenatherum elatius</i> (L.) P.Beauv.<br>ex J.Presl & C.Presl. |                                   |
|        |                                   |                                               | <i>Cistus ladanifer</i> L.                                                 |                                   |
|        |                                   |                                               | <i>Daphne gnidium</i> L.                                                   |                                   |
|        |                                   |                                               | <i>Jasione montana</i> L.                                                  |                                   |
|        |                                   |                                               | <i>Lonicera</i> sp.                                                        |                                   |
|        |                                   |                                               | <i>Orobanche</i> sp.                                                       |                                   |
|        |                                   |                                               | <i>Rosa</i> sp.                                                            |                                   |
|        |                                   |                                               | <i>Smilax aspera</i> L.                                                    |                                   |

| 2019 | No Clearing +<br>Grazing | t <sub>1</sub>                                                                                                                                                                                                                                                                                                                                                                                                                                                                                                                                                                                                                                                                                                                                                                                                                                                                                                                          | t <sub>2</sub>                                                                                                                                                                                                                                                                                                                                                                                                                                                                                                                                                                                                                                                                                                                                                                                                                                                                                                                                                                                | t <sub>3</sub>                                                                                                                                                                                                                                                                                                                                                                                                                                                                                                                                                                                                                                                                                                                                                                                                                                                                                                                     | t <sub>4</sub>                                                                                                                                                                                                                                                                                                                                                                                                                                                                                                                                                                                                                                                                                                                                                                                                                                                                                                                                                                                      |
|------|--------------------------|-----------------------------------------------------------------------------------------------------------------------------------------------------------------------------------------------------------------------------------------------------------------------------------------------------------------------------------------------------------------------------------------------------------------------------------------------------------------------------------------------------------------------------------------------------------------------------------------------------------------------------------------------------------------------------------------------------------------------------------------------------------------------------------------------------------------------------------------------------------------------------------------------------------------------------------------|-----------------------------------------------------------------------------------------------------------------------------------------------------------------------------------------------------------------------------------------------------------------------------------------------------------------------------------------------------------------------------------------------------------------------------------------------------------------------------------------------------------------------------------------------------------------------------------------------------------------------------------------------------------------------------------------------------------------------------------------------------------------------------------------------------------------------------------------------------------------------------------------------------------------------------------------------------------------------------------------------|------------------------------------------------------------------------------------------------------------------------------------------------------------------------------------------------------------------------------------------------------------------------------------------------------------------------------------------------------------------------------------------------------------------------------------------------------------------------------------------------------------------------------------------------------------------------------------------------------------------------------------------------------------------------------------------------------------------------------------------------------------------------------------------------------------------------------------------------------------------------------------------------------------------------------------|-----------------------------------------------------------------------------------------------------------------------------------------------------------------------------------------------------------------------------------------------------------------------------------------------------------------------------------------------------------------------------------------------------------------------------------------------------------------------------------------------------------------------------------------------------------------------------------------------------------------------------------------------------------------------------------------------------------------------------------------------------------------------------------------------------------------------------------------------------------------------------------------------------------------------------------------------------------------------------------------------------|
|      |                          | <i>Andryala integrifolia</i> L.<br><i>Arnoseris minima</i> (L.) Schweigg. & Körte<br><i>Arrhenatherum elatius</i> (L.) P.Beauv. ex J.Presl & C.Presl.<br><br><i>Asterolinon linum-stellatum</i> (L.) Duby<br><br><i>Briza maxima</i> L.<br><i>Bromus madritensis</i> L.<br><br><i>Bromus</i> sp.<br><i>Bromus squarrosus</i> L.<br><br><br><i>Bromus sterilis</i> L.<br><i>Crepis vesicaria</i> subsp. <i>taraxacifolia</i> (Thuill.) Thell.<br><br><i>Cynosurus effusus</i> Link<br><i>Cytisus multiflorus</i> (L'Her.) Sweet<br><br><i>Cytisus scoparius</i> (L.) Link<br><br><i>Erodium</i> sp.<br><i>Galium</i> sp.<br><br><i>Gramineae</i> (sp.)<br><i>Holcus annuus</i> C.A. Mey.<br><br><i>Jasione montana</i> L.<br><br><br><i>Lathyrus</i> sp.<br><i>Leontodon</i> sp.<br><br><i>Micropyrum tenellum</i> (L.) Link<br><br><i>Ornithopus perpusillus</i> L.<br><br><i>Ornithopus</i> sp.<br><br><br><i>Quercus faginea</i> Lam. | <i>Aira caryophyllea</i> L.<br><br><i>Andryala integrifolia</i> L.<br><i>Arnoseris minima</i> (L.) Schweigg. & Körte<br><br><i>Arrhenatherum elatius</i> (L.) P.Beauv. ex J.Presl & C.Presl.<br><br><i>Avena barbata</i> Link<br><br><i>Briza maxima</i> L.<br><br><i>Bromus</i> sp.<br><br><i>Bromus sterilis</i> L.<br><br><br><i>Campanula rapunculus</i> L.<br><br><br><i>Cerastium</i> sp.<br><i>Crepis capillaris</i> (L.) Wallr.<br><br><i>Cynosurus effusus</i> Link<br><i>Cytisus multiflorus</i> (L'Her.) Sweet<br><br><i>Cytisus scoparius</i> (L.) Link<br><br><i>Dactylis glomerata</i> L.<br><br><i>Gramineae</i> (sp.)<br><i>Holcus annuus</i> C.A.Mey.<br><br><i>Jasione montana</i> L.<br><i>Lactuca viminea</i> (L.) J.Presl & C.Presl<br><br><i>Leontodon</i> sp.<br><i>Melica ciliata</i> subsp. <i>magnolii</i> (Gren. & Godr.) Husn.<br><br><i>Micropyrum tenellum</i> (L.) Link<br><br><i>Ornithopus compressus</i> L.<br><br><br><br><i>Ornithopus perpusillus</i> L. | <i>Arenaria montana</i> L.<br><i>Arrhenatherum elatius</i> (L.) P.Beauv. ex J.Presl & C.Presl.<br><br><i>Asterolinon linum-stellatum</i> (L.) Duby<br><br><br><i>Briza maxima</i> L.<br><i>Bromus madritensis</i> L.<br><br><i>Bromus</i> sp.<br><i>Bromus squarrosus</i> L.<br><br><i>Cerastium</i> sp.<br><i>Crepis vesicaria</i> subsp. <i>taraxacifolia</i> (Thuill.) Thell.<br><br><br><i>Cynosurus effusus</i> Link<br><i>Cytisus multiflorus</i> (L'Her.) Sweet<br><br><i>Cytisus scoparius</i> (L.) Link<br><br><i>Cytisus</i> sp.<br><i>Dactylis glomerata</i> L.<br><i>Eryngium tenue</i> Lam.<br><br><i>Gramineae</i> (sp.)<br><i>Holcus annuus</i> C.A.Mey.<br><br><i>Jasione montana</i> L.<br><br><br><i>Lathyrus cicera</i> L.<br><i>Lathyrus</i> sp.<br><br><i>Micropyrum tenellum</i> (L.) Link<br><br><i>Quercus faginea</i> Lam.<br><br><i>Quercus suber</i> L.<br><br><br><i>Torilis arvensis</i> (Huds.) Link | <i>Aira caryophyllea</i> L.<br><br><i>Anthriscus caucalis</i> M.Bieb.<br><i>Arrhenatherum elatius</i> (L.) P.Beauv. ex J.Presl & C.Presl.<br><br><br><br><i>Avena barbata</i> Link<br><br><i>Avena</i> sp.<br><br><i>Briza maxima</i> L.<br><br><i>Bromus madritensis</i> L.<br><br><br><i>Bromus</i> sp.<br><br><br><i>Bromus squarrosus</i> L.<br><br><br><br><i>Caryophyllaceae</i> (sp.)<br><i>Cerastium</i> sp.<br><br><i>Coronilla repanda</i> (Poir.) Guss.<br><br><i>Cynosurus effusus</i> Link<br><i>Cytisus multiflorus</i> (L'Her.) Sweet<br><br><i>Cytisus scoparius</i> (L.) Link<br><br><i>Dactylis glomerata</i> L.<br><br><i>Galium</i> sp.<br><br><i>Holcus annuus</i> C.A.Mey.<br><br><br><br><i>Hornungia petraeae</i> subsp. <i>petraeae</i> Rchb.<br><br><i>Jasione montana</i> L.<br><br><br><br><i>Lactuca viminea</i> (L.) J.Presl & C.Presl<br><br><i>Leontodon</i> sp.<br><br><i>Lolium</i> sp.<br><br><i>Melica ciliata</i> subsp. <i>magnolii</i> (Gren. & Godr.) Husn. |

|        |                                                                          |                                                                          |                                          |                                                                          |
|--------|--------------------------------------------------------------------------|--------------------------------------------------------------------------|------------------------------------------|--------------------------------------------------------------------------|
|        | <i>Quercus suber</i> L.                                                  | <i>Petrorhagia nanteuilii</i> (Burnat)<br>P.W.Ball & Heywood             | <i>Vicia sativa</i> L.                   | <i>Micropyrum tenellum</i> (L.) Link                                     |
|        | <i>Rubus</i> sp.                                                         | <i>Quercus faginea</i> Lam.                                              | <i>Viola kitaibeliana</i> Schult.        | <i>Myosotis</i> sp.                                                      |
|        | <i>Senecio</i> sp.                                                       | <i>Ranunculus ollissiponensis</i> subsp.<br><i>ollissiponensis</i> Pers. | <i>Vulpia bromoides</i> (L.) S.F.Gray    | <i>Ranunculus ollissiponensis</i> subsp.<br><i>ollissiponensis</i> Pers. |
|        | <i>Silene latifolia</i> Poir.                                            | <i>Vulpia bromoides</i> (L.) S.F.Gray                                    | around                                   | <i>Rubus ulmifolius</i> Schott                                           |
|        | <i>Torilis arvensis</i> (Huds.) Link                                     | around                                                                   | <i>Crepis vesicaria</i> (Thuill.) Thell. | <i>Rumex acetosella</i> subsp. <i>angiocarpus</i><br>(Murb.) Murb.       |
|        | <i>Vicia sativa</i> L.                                                   | <i>Eryngium campestre</i> L.                                             | <i>Campanula rapunculus</i> L.           | <i>Sedum album</i> L.                                                    |
|        | <i>Vicia</i> sp.                                                         | <i>Eryngium tenue</i> Lam.                                               | <i>Cistus ladanifer</i> L.               | <i>Sesamoides purpurescens</i> (L.) G.López                              |
|        | <i>Vulpia bromoides</i> (L.) S.F.Gray                                    | <i>Muscari comosum</i> (L.) Mill.                                        | <i>Digitalis purpurea</i> L.             | <i>Silene latifolia</i> Poir.                                            |
| around | <i>Avena barbata</i> Link                                                | <i>Orobanche rapum-genistae</i> Thuill.                                  | <i>Rubus</i> sp.                         | <i>Torilis arvensis</i> (Huds.) Link                                     |
|        | <i>Digitalis purpurea</i> L.                                             | <i>Thapsia villosa</i> L.                                                | <i>Vicia lutea</i> L.                    | <i>Trifolium arvense</i> L.                                              |
|        | <i>Lactuca viminea</i> (L.) J.Presl & C.Presl                            | <i>Trifolium arvense</i> L.                                              |                                          | <i>Vulpia</i> sp.                                                        |
|        | <i>Lonicera periclymenum</i> L.                                          |                                                                          | around                                   | <i>Andryala integrifolia</i> L.                                          |
|        | <i>Ranunculus ollissiponensis</i> subsp.<br><i>ollissiponensis</i> Pers. |                                                                          |                                          | <i>Campanula rapunculus</i> L.                                           |
|        | <i>Rubus ulmifolius</i> Schott                                           |                                                                          |                                          | <i>Cistus ladanifer</i> L.                                               |
|        | <i>Tamus communis</i> L.                                                 |                                                                          |                                          | <i>Halimium umbellatum</i> (L.) Spach                                    |
|        | <i>Thapsia villosa</i> L.                                                |                                                                          |                                          | <i>Hypericum perforatum</i> L.                                           |
|        |                                                                          |                                                                          |                                          | <i>Lavandula pedunculata</i> (Mill.) Cav.                                |
|        |                                                                          |                                                                          |                                          | <i>Quercus faginea</i> Lam.                                              |
|        |                                                                          |                                                                          |                                          | <i>Sanguisorba verrucosa</i> (Link ex G.Don)<br>Ces.                     |
|        |                                                                          |                                                                          |                                          | <i>Thapsia villosa</i> L.                                                |
|        |                                                                          |                                                                          |                                          | <i>Trifolium dubium</i> Sibth.                                           |

The list of species includes all records along the 20m transect and those present in a 5m wide band previously unidentified on the transect (around).
